# Supplementary material
Source: Springer Nature journal article supplement (https://www.springermedizin.de/resource/supplementary/12961_2010_195_MOESM4_ESM.pdf/9571630)

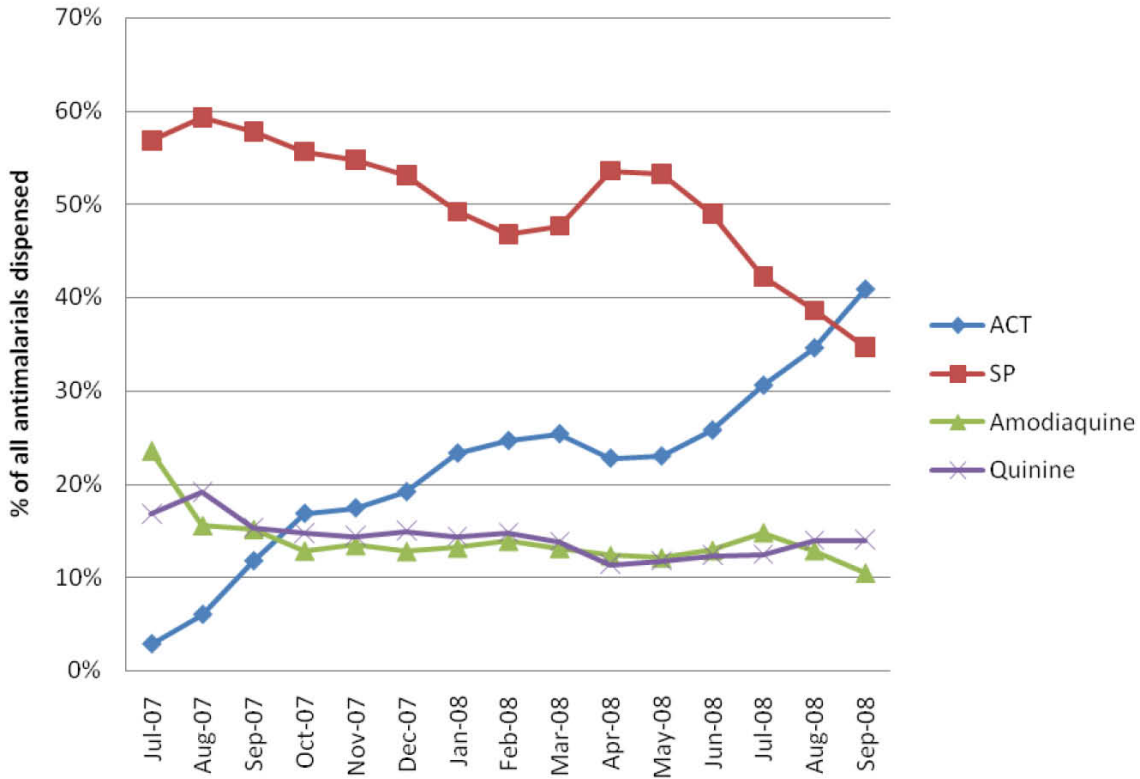

Supplement: MOESM4 [file 9571630]
